# Supplementary material for: Quantitative Analysis of Survivin Protein Expression and Its Therapeutic Depletion by an Antisense Oligonucleotide in Human Lung Tumors
Source: PubMed Central journal article supplement — Mol Ther Nucleic Acids. 2012 Jun 19;1(6):e30–. doi: 10.1038/mtna.2012.19 (PMC3390226; doi:10.1038/mtna.2012.19), 2012-06-19
Supplement: mtna201219x1.pdf [file mtna201219x1.pdf]

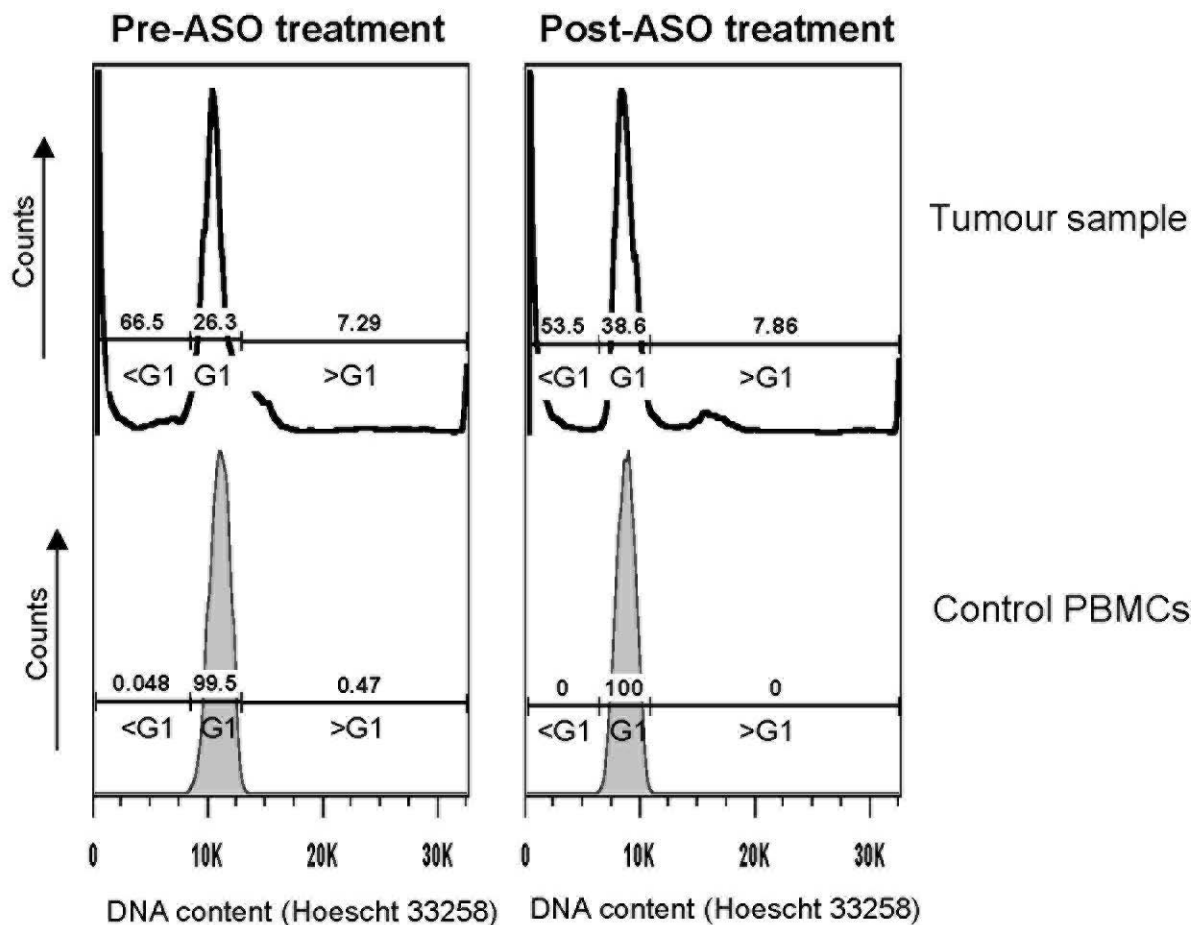

**Supplementary Figure 1.** Example of how sub-G1 (<G1), G1 and greater than G1 (>G1) DNA content was defined using human peripheral blood mononuclear cells (PBMCs) with a normal human diploid DNA content.
