# Supplementary material for: Quantitative Analysis of Survivin Protein Expression and Its Therapeutic Depletion by an Antisense Oligonucleotide in Human Lung Tumors
Source: PubMed Central journal article supplement — Mol Ther Nucleic Acids. 2012 Jun 19;1(6):e30–. doi: 10.1038/mtna.2012.19 (PMC3390226; doi:10.1038/mtna.2012.19), 2012-06-19
Supplement: mtna201219x2.pdf [file mtna201219x2.pdf]

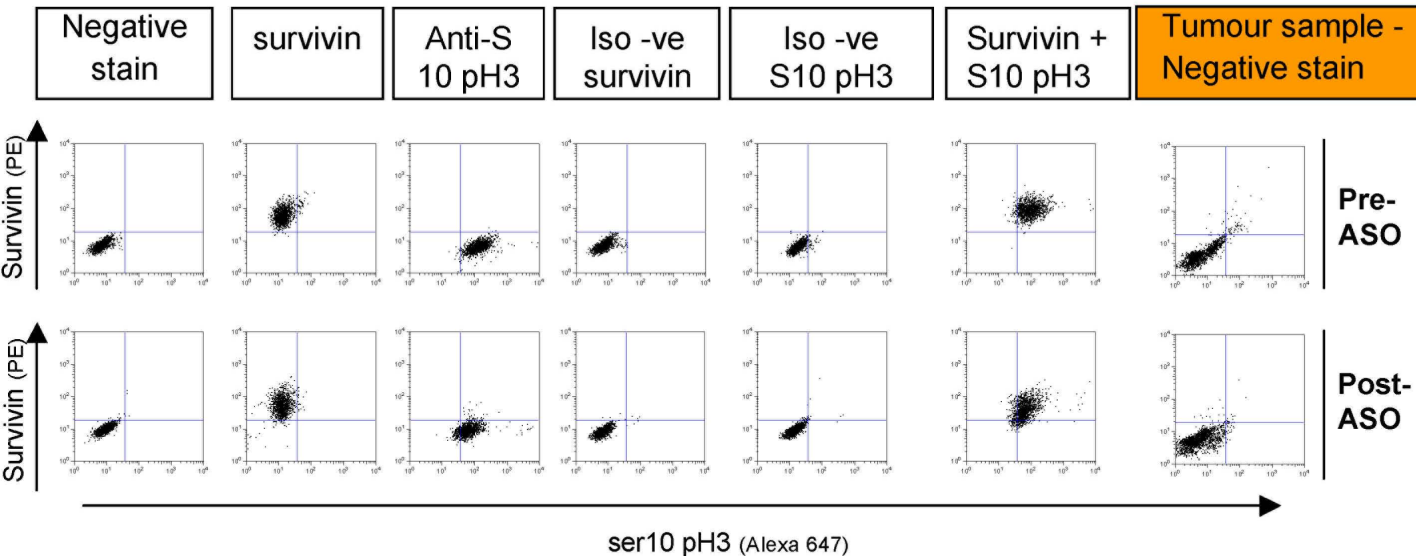

**Supplementary Figure 2.** Shows that isotype control antibodies (Iso -ve) fail to stain an NSCLC tumor cell line (NCI-H647) compared to anti-survivin and anti-serine 10 phospho-H3 antibodies, or a double stain with both antibodies. These controls were included during the analysis of each tumor sample, and the examples shown illustrate the staining controls for the patient sample shown in Figure 3. Also shown is the Pre and Post-ASO tumor sample described in Figure 3, unstained with either antibody. Due to the very limited quantity of tumor material, this was the only negative control applied to the clinical samples.
